# Supplementary material for: Quality control recommendations for RNASeq using FFPE samples based on pre-sequencing lab metrics and post-sequencing bioinformatics metrics
Source: PubMed Central journal article supplement (PMC9479231; doi:10.1186/s12920-022-01355-0), 2022-09-16
Supplement: 12920_2022_1355_MOESM2_ESM.pdf [file 12920_2022_1355_MOESM2_ESM.pdf]

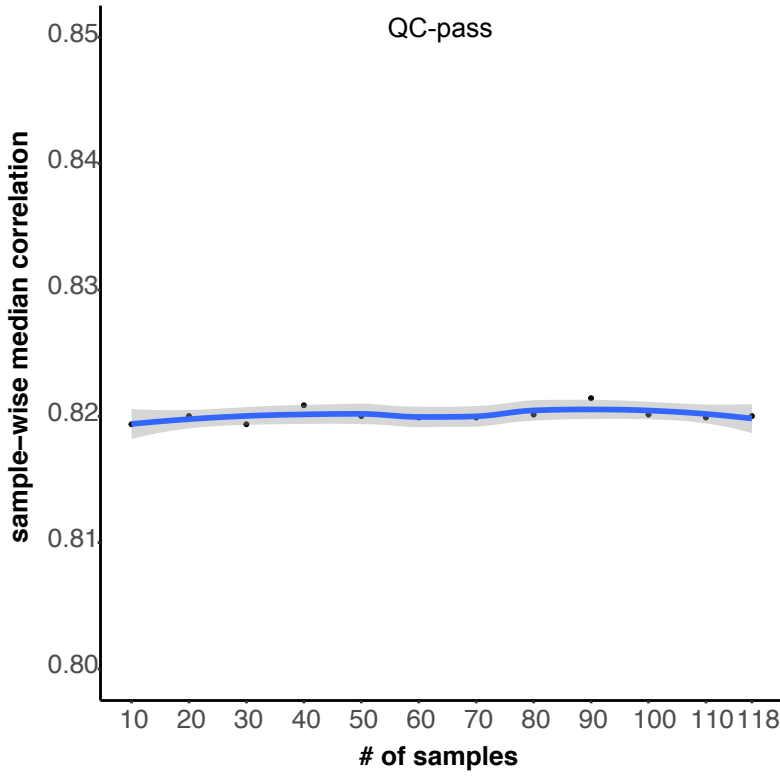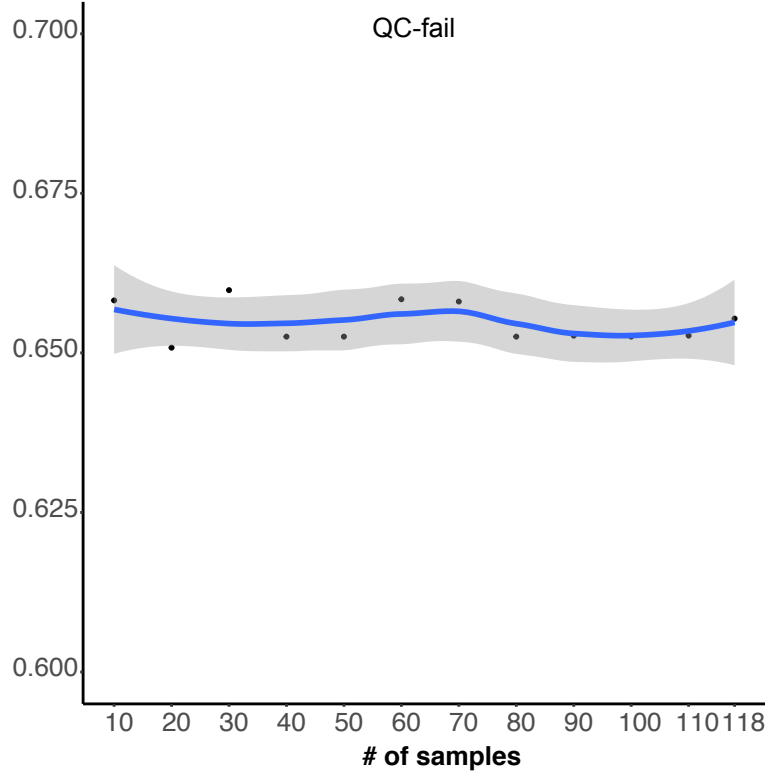

**Additional file 2**

**Evaluation of sample size on the calculation of sample wise median correlation**

X axis indicates # of samples based on sub-sampling. Y axis shows re-calculated sample-wise median correlation for each subset. Left panel shows “median\_cor\_expr” for one selected QC-pass sample. Right panel shows “median\_cor\_expr” for one selected QC-fail sample
