# Supplementary material for: Quality control recommendations for RNASeq using FFPE samples based on pre-sequencing lab metrics and post-sequencing bioinformatics metrics
Source: PubMed Central journal article supplement (PMC9479231; doi:10.1186/s12920-022-01355-0), 2022-09-16
Supplement: 12920_2022_1355_MOESM5_ESM.pdf [file 12920_2022_1355_MOESM5_ESM.pdf]

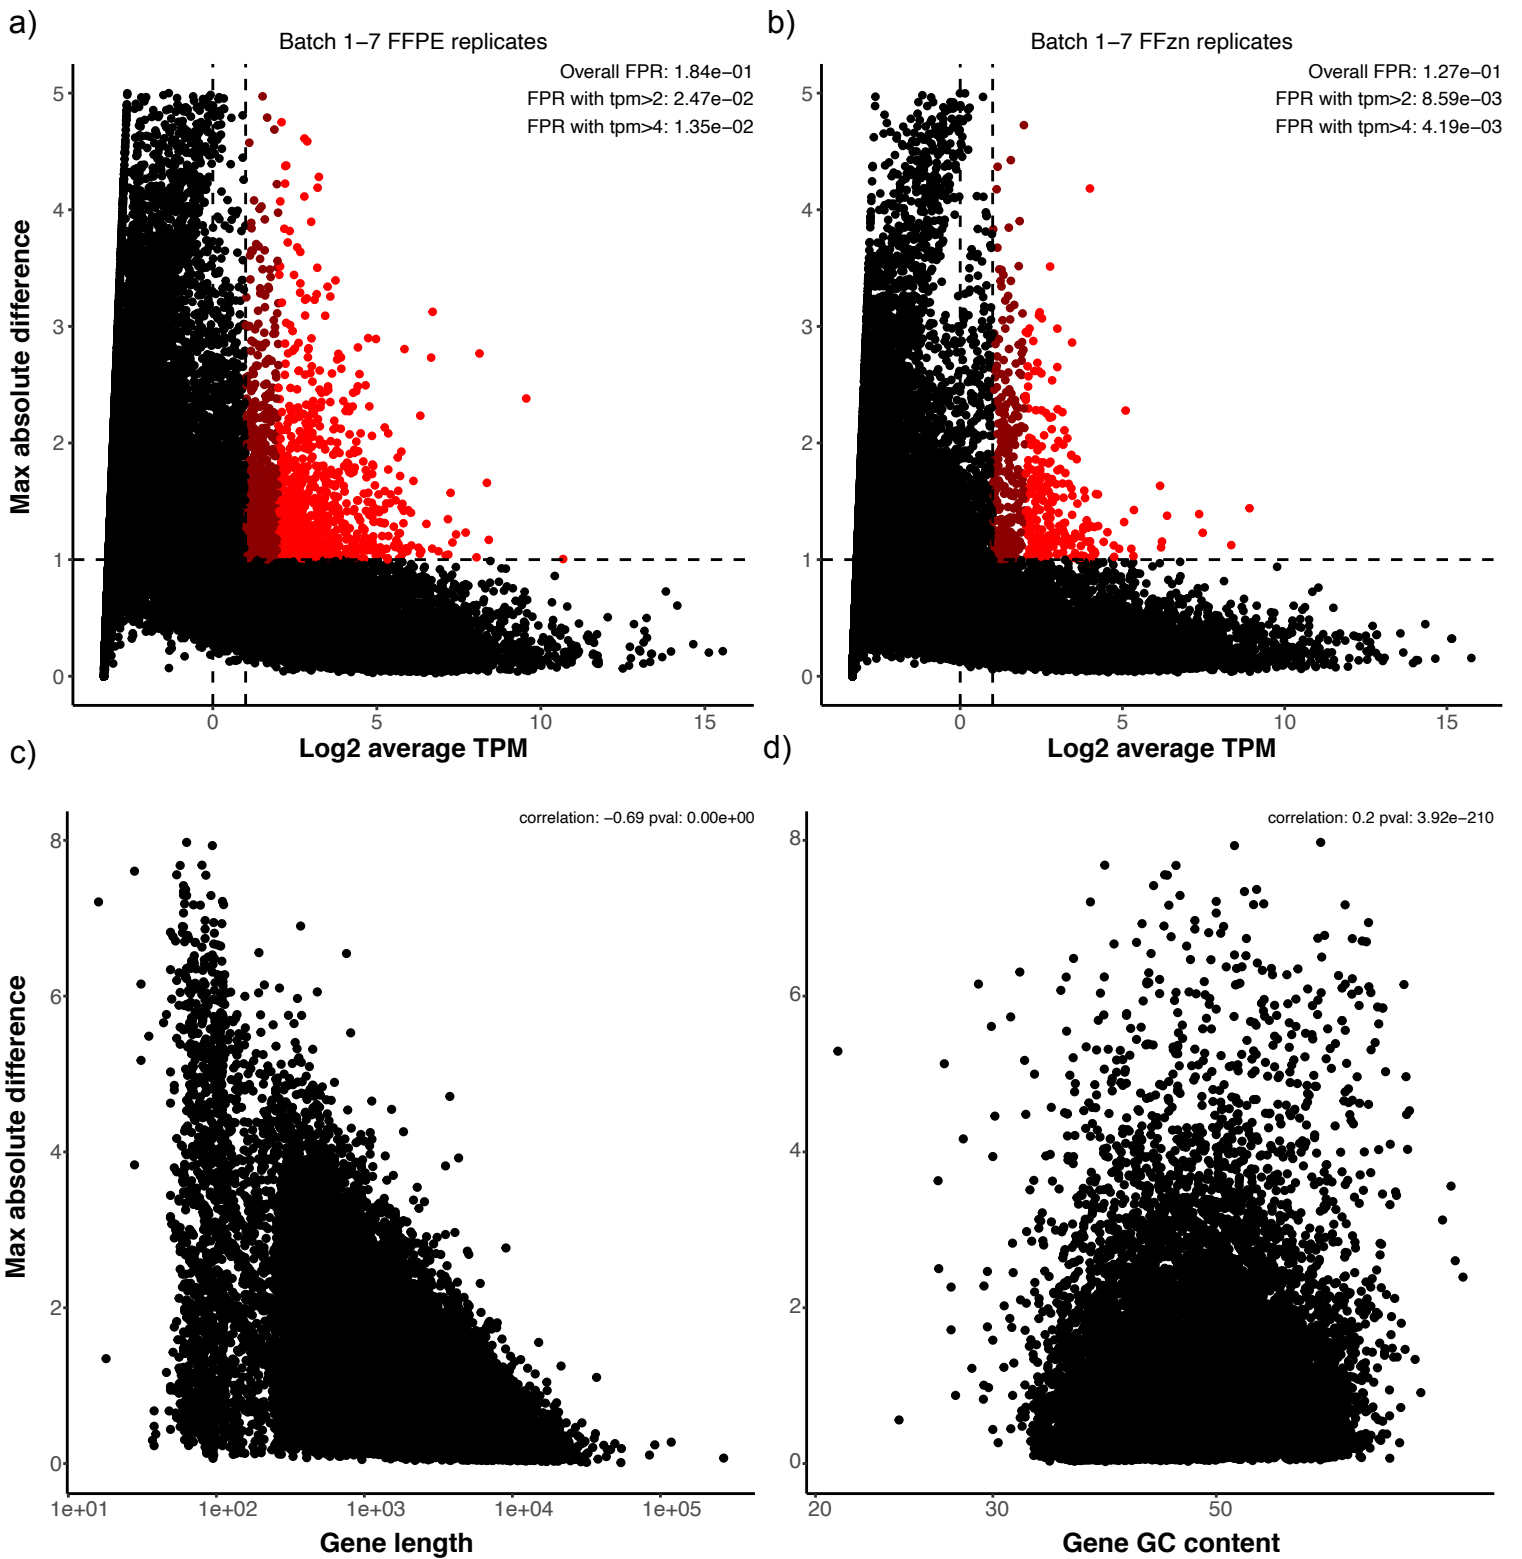

**Additional file 5**

- a). Scatter plot of log2 average expression with max absolute differences among FFPE replicates in sequencing batch 1 and batch 7. Vertical dashed lines indicate log2 average expression of 0 and 1. Horizontal dashed line indicates max absolute differences of 1 (2-fold change). False positives are shown in red. The false positive rate at different cutoffs is shown in the top right-hand corner.
- b). Scatter plot of log2 average expression with max absolute differences among FFzn replicates in sequencing batch 1 to batch 7.
- c). Scatter plot of gene length with max absolute differences among FFPE replicates in sequencing batch 1 to batch 7
- d). Scatter plot of gene GC content with max absolute differences among FFPE replicates in sequencing batch 1 to batch 7
