# Supplementary material for: Quality control recommendations for RNASeq using FFPE samples based on pre-sequencing lab metrics and post-sequencing bioinformatics metrics
Source: PubMed Central journal article supplement (PMC9479231; doi:10.1186/s12920-022-01355-0), 2022-09-16
Supplement: 12920_2022_1355_MOESM7_ESM.pdf [file 12920_2022_1355_MOESM7_ESM.pdf]

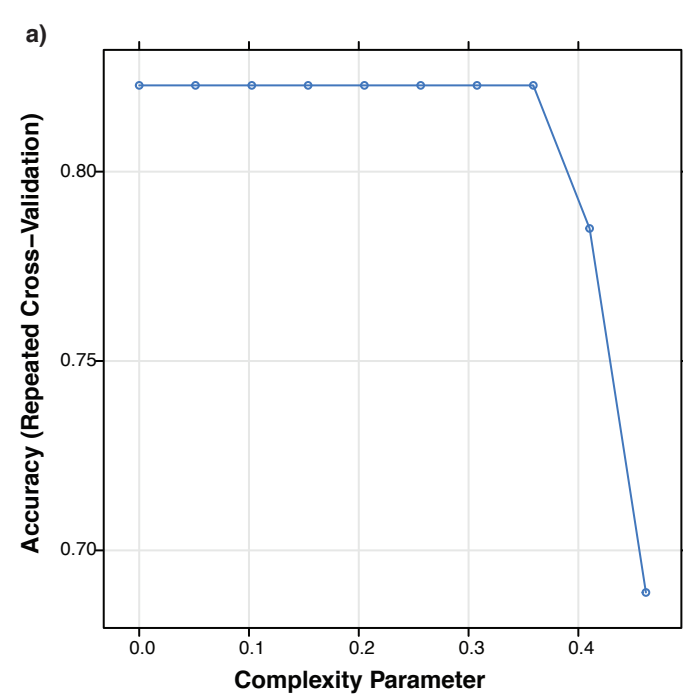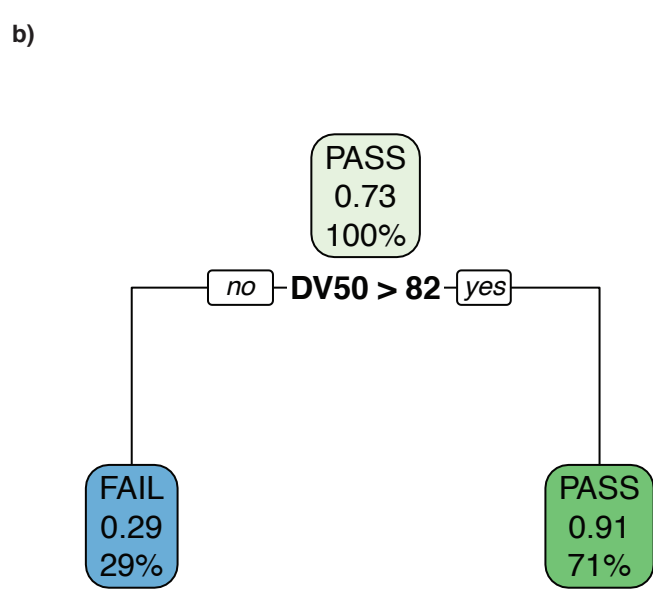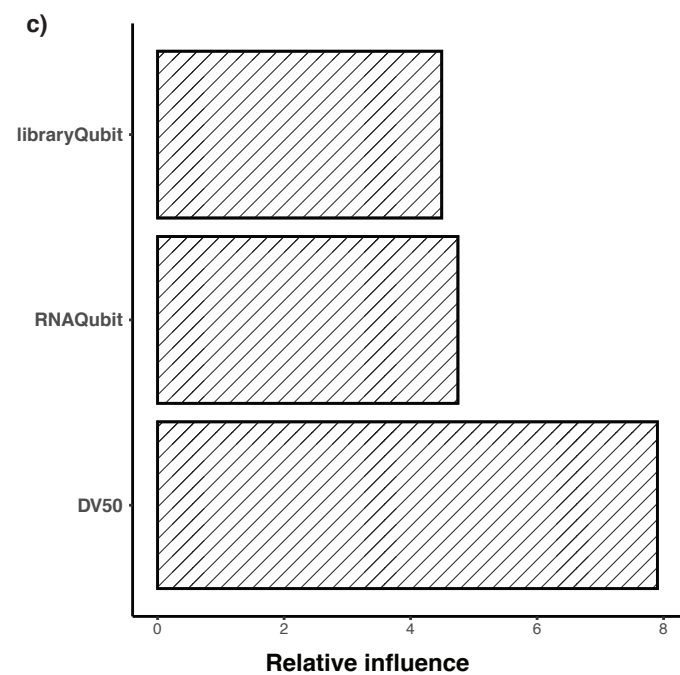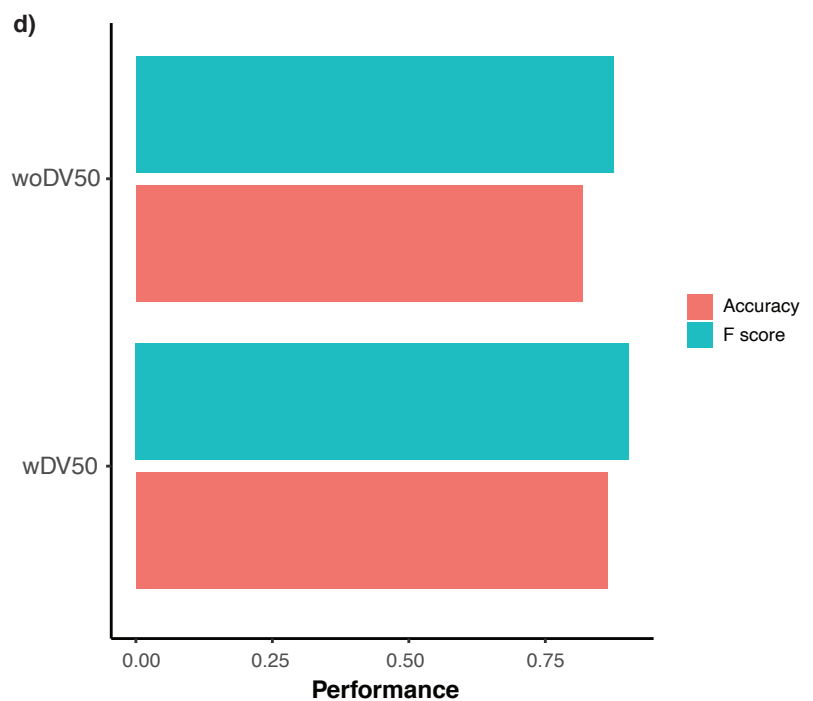

### Additional file 7

#### A decision tree model to predict QC pass/fail based on DV50

QC pass and fail refer to sample status defined by bioinformatics metrics; QC failed samples were those excluded from the final dataset.

- Parameter tuning based on repeated cross validation using grid search with 10 choices of complexity parameter. Complexity parameter with the highest cross-validation accuracy was used to build the final model
- Decision tree diagram with branches indicating specific cutoffs based on DV50 that was predictive of the qc pass/fail status. Samples with DV50 > 82 shows the best RNA-seq data quality. There are three values in each box/node. The upper value (PASS/FAIL) in each box indicates the predicted qc status based on DV50 at each branch of decision tree. The middle number in each box indicates the ratio of qc-pass samples as defined by bioinformatics metrics. The bottom number in each box indicates the percentage of total number of samples within each box.
- Relative contribution of the pre-sequencing lab metrics, including library Qubit, RNA Qubit and DV50 in building the model
- Performance comparison (Accuracy and F score) between models with or without DV50 metric.
